# Supplementary material
Source: PubMed Central journal article supplement (PMC6470014)
Supplement: NIHMS999629-supplement-Supplemental_Information.pdf [file NIHMS999629-supplement-Supplemental_Information.pdf]

Supporting Information

for

**High-Resolution EXAFS Provides Evidence for a Longer Fe•••Fe Distance in the Q Intermediate of Methane Monooxygenase**

George E. Cutsail III,<sup>†</sup> Rahul Banerjee,<sup>‡,§</sup> Ang Zhou,<sup>§,#</sup> Lawrence Que, Jr.,<sup>§,#</sup> John D. Lipscomb,<sup>‡,§</sup> Serena DeBeer<sup>†,\*</sup>

<sup>†</sup>Max Planck Institute for Chemical Energy Conversion, Stiftstr. 34, D-45470 Mülheim an der Ruhr, Germany

<sup>‡</sup>Department of Biochemistry, Molecular Biology and Biophysics, 321 Church St. SE, Minneapolis, MN 55455

<sup>§</sup>Center for Metals in Biocatalysis, University of Minnesota, Minneapolis, Minnesota 55455, USA.

<sup>#</sup>Department of Chemistry, University of Minnesota, 207 Pleasant Street SE, Minneapolis, MN 55455

\*Correspondence to: serena.debeer@cec.mpg.de

|                                                                                                                                                   |    |
|---------------------------------------------------------------------------------------------------------------------------------------------------|----|
| Fig. S1. Mössbauer spectrum of MMOH <sup>red</sup> complexed with MMOB collected at 80 K.....                                                     | 3  |
| Fig. S2. Mössbauer spectrum of MMOH <sup>ox</sup> complexed with MMOB collected at 80 K. ....                                                     | 4  |
| Fig. S3. Mössbauer spectra of MMOH-RFQ (powder packed) collected at 80 K.....                                                                     | 5  |
| Fig. S4. Mössbauer spectra of MMOH-RFQ (frozen) collected at 80 K. ....                                                                           | 6  |
| Table S1. Isomer shift ( $\delta$ ) and quadrupole splitting ( $\Delta E_Q$ ) values of the three diiron components within MMOH-RFQ samples. .... | 7  |
| Fig. S5. K $\alpha$ -HERFD XAS of MMOH <sup>red</sup> , MMOH <sup>ox</sup> , MMOH-RFQ, Q and previously published Q.....                          | 8  |
| Fig. S6. Fe-K $\alpha$ emission spectra of MMOH <sup>red</sup> , MMOH <sup>ox</sup> , MMOH-RFQ and MMOH-Q. ....                                   | 9  |
| Fig. S7. K $\alpha$ HERFD-XAS of MMOH-RFQ with digital $\alpha$ -Fe contamination.....                                                            | 10 |
| EXAFS fitting.....                                                                                                                                | 11 |
| Fig. S8. Additional HERFD-EXAFS fits of MMOH <sup>ox</sup> .....                                                                                  | 12 |
| Table S2. HERFD-EXAFS Fit Parameters of MMOH <sup>ox</sup> for Fig. S8.....                                                                       | 12 |
| Fig. S9. Comparison of PFY MMOH <sup>red</sup> with phase-shift recorection.....                                                                  | 13 |
| Fig. S10. Additional HERFD-EXAFS fits of MMOH <sup>red</sup> .....                                                                                | 14 |
| Table S3. HERFD-EXAFS Fit Parameters of MMOH <sup>red</sup> for Fig. S9.....                                                                      | 14 |
| Table S4. HERFD-EXAFS Fit Parameters of MMOH-RFQ (Attempts to fit short diiron distance $\sim 2.8$ Å). ....                                       | 15 |
| Fig. S11. HERFD-EXAFS fits of MMOH-RFQ – 1 and 2, as Detailed in Table S4. ....                                                                   | 16 |

**Fig. S1.** Mössbauer spectrum of  $\text{MMOH}^{\text{red}}$  complexed with MMOB collected at 80 K.

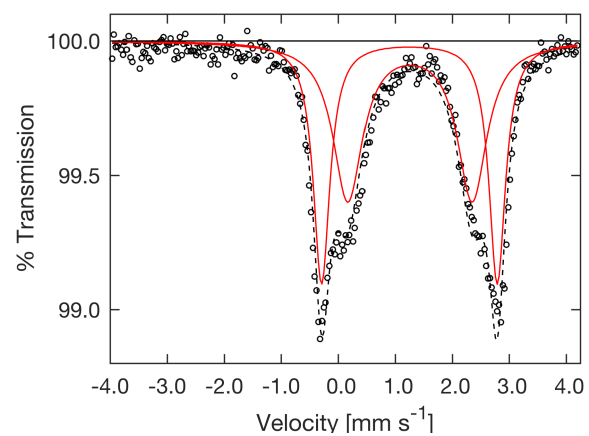

**Fig. S2.** Mössbauer spectrum of  $\text{MMOH}^{\text{ox}}$  complexed with MMOB collected at 80 K.

A small diiron(II) component (10%), of unoxidized  $\text{MMOH}^{\text{red}}$  is observed and fit as a single quadrupole doublet, magenta.

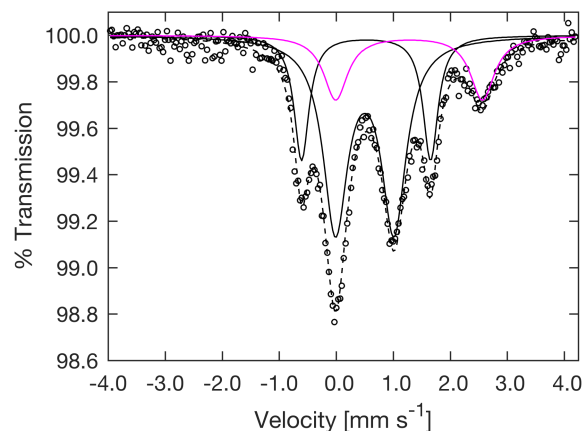

**Fig. S3.** Mössbauer spectra of MMOH-RFQ (powder packed) collected at 80 K.

Red: MMOH<sup>red</sup>; Black: MMOH<sup>ox</sup>; Blue: MMOH-Q

Sample 1:

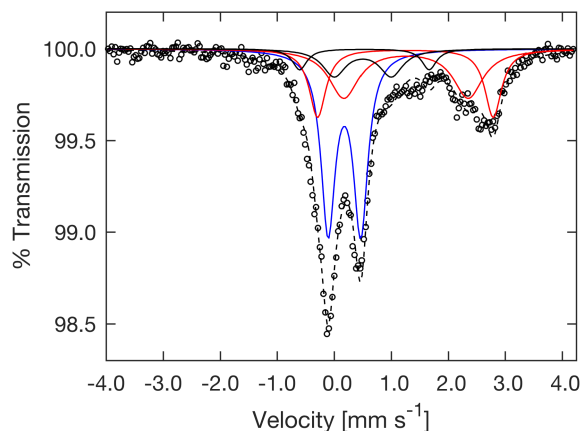

Sample 2:

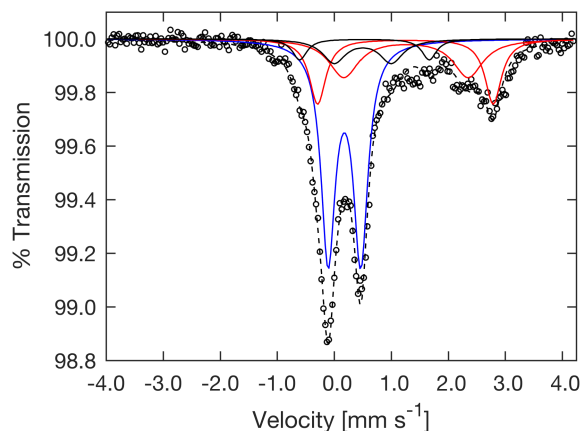

**Fig. S4.** Mössbauer spectra of MMOH-RFQ (frozen) collected at 80 K.

Red: MMOH<sup>red</sup>; Black: MMOH<sup>ox</sup>; Blue: MMOH-Q

Sample 1:

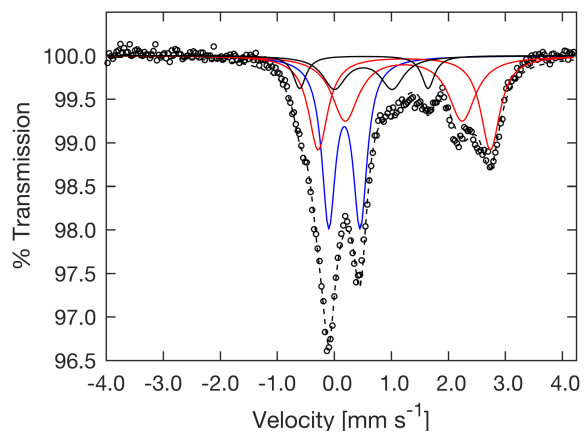

Sample 2:

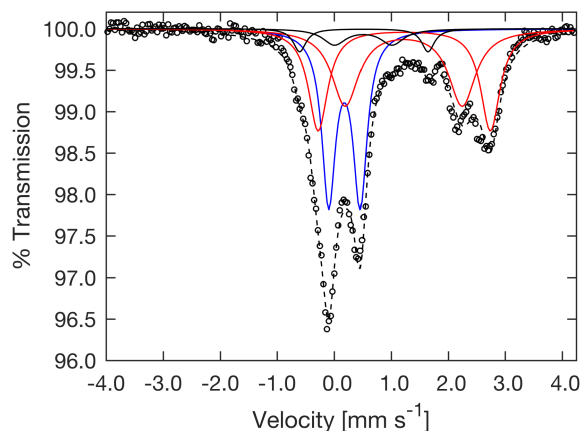

**Table S1.** Isomer shift ( $\delta$ ) and quadrupole splitting ( $\Delta E_Q$ ) values of the three diiron components within MMOH-RFQ samples.

Isomer shifts and quadrupole splitting experimental values were determined by fitting spectra with Lorentzian lines through the use of the software mf developed by Dr. Eckhard Bill.

|                                    | <b>Reduced</b>       |      | <b>Oxidized</b>      |      | <b>Q</b>             |                                          |
|------------------------------------|----------------------|------|----------------------|------|----------------------|------------------------------------------|
| $\delta$ (mm s <sup>-1</sup> )     | 1.25                 | 1.26 | 0.53                 | 0.50 | 0.18                 |                                          |
| $\Delta E_Q$ (mm s <sup>-1</sup> ) | 2.18                 | 3.08 | 2.27                 | 1.00 | 0.56                 |                                          |
| <b>Component %</b>                 | <b>39.5 (36, 43)</b> |      | <b>14.5 (14, 15)</b> |      | <b>46 (50, 42)</b>   | <b>Powder (Fig. S4)<br/>(MMOH-RFQ-1)</b> |
|                                    | <b>54 (51, 57)</b>   |      | <b>13 (17, 9)</b>    |      | <b>33.5 (33, 34)</b> | <b>Frozen (Fig. S3)<br/>(MMOH-RFQ-2)</b> |

**Fig. S5.**  $K\alpha$ -HERFD XAS of  $\text{MMOH}^{\text{red}}$ ,  $\text{MMOH}^{\text{ox}}$ ,  $\text{MMOH-RFQ}$ , Q and previously published Q.

The ‘pure’ Q spectrum was obtained by deconvolution of the  $\text{MMOH-RFQ}$  by subtraction of  $\text{MMOH}^{\text{red}}$  and  $\text{MMOH}^{\text{ox}}$  (complexed with  $\text{MMOB}$ ) based on the Mössbauer quantification (Table S1) compared with the published  $K\alpha$ -HERFD XAS of  $\text{MMOH-Q}$  from R. G. Castillo, et. al. (Q-RCG).<sup>1</sup>

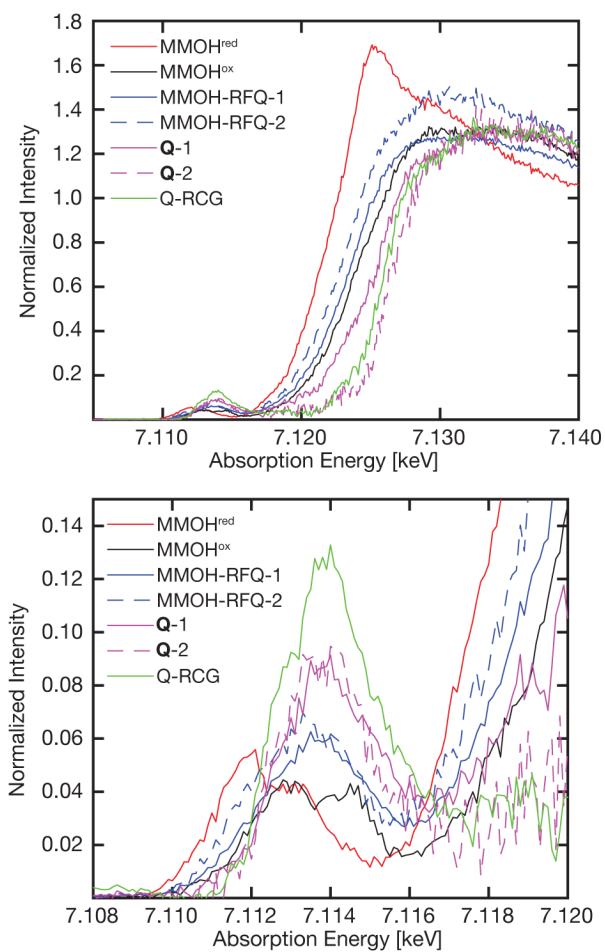



**Fig. S6.** Fe-K $\alpha$  emission spectra of MMOH<sup>red</sup>, MMOH<sup>ox</sup>, MMOH-RFQ and MMOH-Q.

The ‘pure’ MMOH-Q spectrum is the renormalized spectrum of MMOH-RFQ after quantitative subtraction of the MMOH<sup>red</sup> and MMOH<sup>ox</sup> components (complexed with MMOB) based on the Mössbauer quantification. All K  $\alpha$  X-ray emission spectra were collected non-resonantly with an incident energy of 7800 eV.

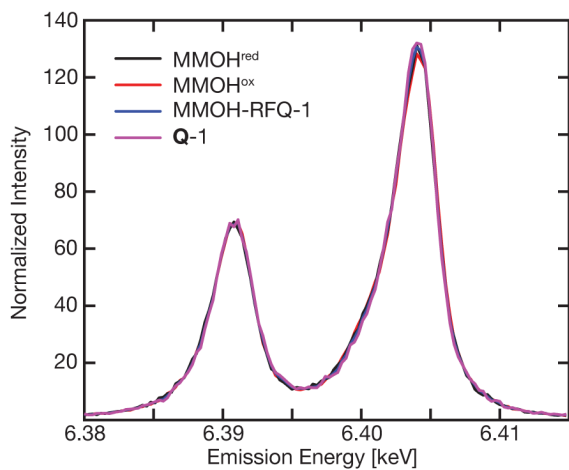

**Fig. S7.**  $K\alpha$  HERFD-XAS of MMOH-RFQ with digital  $\alpha$ -Fe contamination

The edge position of MMOH-RFQ is not dramatically shifted to lower energy upon the addition of  $\sim 5\%$  to  $\sim 17\%$   $\alpha$ -Fe to the spectrum. However, the pre-edge shape and intensity is strongly modulated. The pre-edge intensity increases over the entire  $\sim 7111$ - $7118$  eV range, resulting in a pre-edge that is no longer defined by a single peak, but rather a “shelf-like” plateau. This unusual pre-edge shape is the most diagnostic observable in the XAS data for metal contamination.

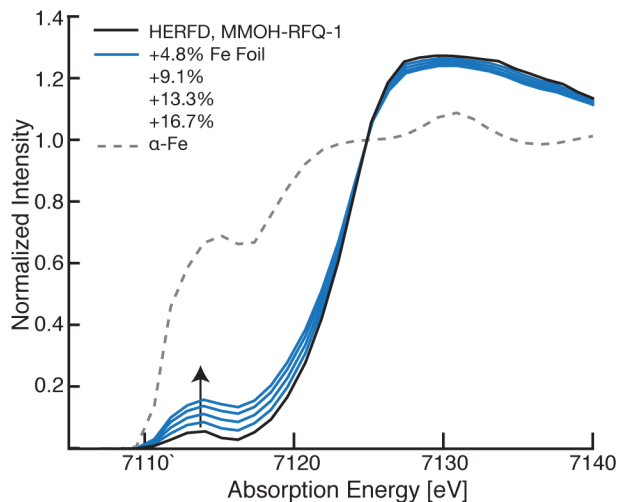

## EXAFS fitting.

Theoretical EXAFS spectra were calculated using Artemis<sup>2</sup> utilizing the multiple scattering FEFF6 code.<sup>3</sup> The EXAFS amplitude,  $\chi(k)$ , is given by

$$\chi(k) = \sum_R S_0^2 N \frac{|f_{\text{eff}}(k)|}{kR^2} \sin(2kR + \phi_k) e^{-2kR/\lambda_k} e^{-2\sigma^2 k^2}$$

where  $S_0^2$  is the overall many-body amplitude factor,  $N$ , is the degeneracy of the paths,  $|F_{\text{eff}}(k)|$  is the effective scattering amplitude, and  $R$  is the absorber-scatterer distance. A Debye-Waller like factor,  $\exp(-2\sigma^2 k^2)$  is also included to account for disorder. Lastly,  $\lambda_k$  is the mean free path of the photoelectron and  $\phi_k$  is the total photoelectron wave phase shift for the interaction between the absorber and the scatterer.

Models of MMOH<sup>red</sup> and MMOH<sup>ox</sup> were generated from the PDB deposited crystal structures 1FYZ and 1FZ1,<sup>4</sup> respectively, by selection of all atoms within 8 Å of the diiron active site through the use of PyMOL.<sup>5</sup> EXAFS scattering paths were calculated with FEFF6<sup>2</sup> and employed the FEFF cards: SIG2 0.001; RMAX 5; NLEGS 4.

Individual scattering paths were selected and fit within Artemis from paths calculated by FEFF6. The Fourier-transform spectrum of each were fit over a range of  $R = 1.0$  to  $3.4$  Å (non-phase shift corrected). The FT is the product of a transform of  $k^3$ -weighted EXAFS spectrum with a Hann window over the range of  $k = 2$  to  $11$  Å<sup>-1</sup>. By grouping similar scattering paths of a common coordination shell and increasing its degeneracy,  $N$ , the number of variables used for that coordination shell is minimal, 2 variables:  $\sigma^2$  and  $\Delta R$ . A single  $\Delta E_0$  variable is used for all paths in a given fit.  $S_0^2$  was set to 0.9 for all paths. The  $E_0$  for MMOH<sup>red</sup> and MMOH<sup>ox</sup> were set to 7122.17 and 7125.12 eV, respectively and MMOH-RFQ-1 and -RFQ-2 samples were 7124.10 and 7123.25 eV, respectively. Goodness of final fits were evaluated by their  $F$ -value, defined below:

$$F = \frac{\sum_{i=1}^n (d_i - f_i)^2}{\sum_{i=1}^n d_i^2}$$

where  $d$  and  $f$  represent the raw data and the fit, respectively. All reported  $F$ -values were calculated over an expanded  $R$  range of  $R = 0$  to  $4$  Å.

**Fig. S8.** Additional HERFD-EXAFS fits of MMOH<sup>ox</sup>

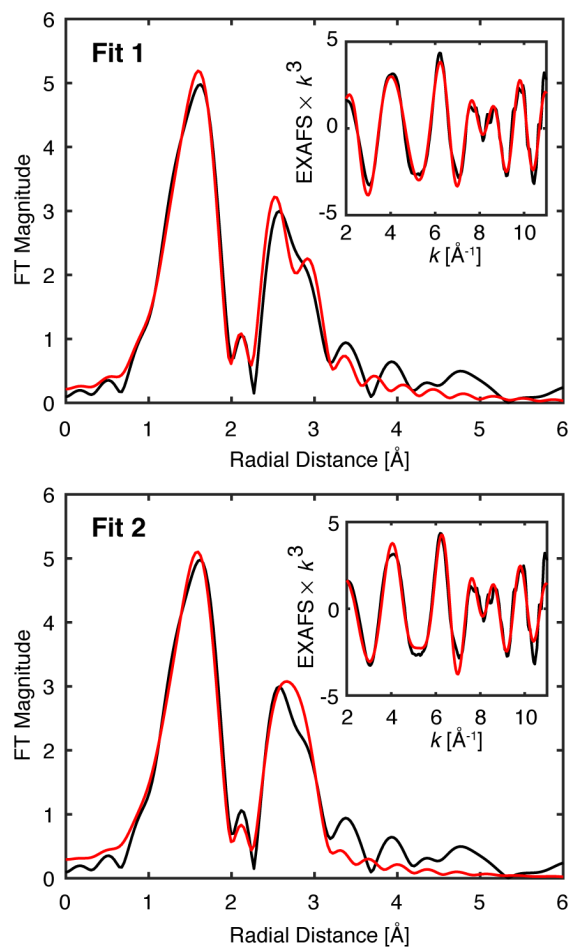

**Table S2.** HERFD-EXAFS Fit Parameters of MMOH<sup>ox</sup> for Fig. S8

| <b>Fit 1</b>             |                        |              |            |                                                                          |            |
|--------------------------|------------------------|--------------|------------|--------------------------------------------------------------------------|------------|
| <b>N</b>                 | <b>Scattering Path</b> | <b>R (Å)</b> | <b>+/-</b> | <b><math>\sigma^2</math> (<math>\times 10^{-3}</math> Å<sup>2</sup>)</b> | <b>+/-</b> |
| 5                        | Fe-O/N                 | 2.057        | 0.010      | 12.6                                                                     | 1.0        |
| 1                        | Fe-O/N                 | 2.480        | 0.036      | 9.9                                                                      | 5.7        |
| 1                        | Fe-Fe                  | 3.056        | 0.011      | 1.3                                                                      | 0.9        |
| 3                        | Fe-C                   | 3.304        | 0.031      | 4.9                                                                      | 4.1        |
| $\Delta E_0 = + 2.51$ eV |                        |              |            | $F = 0.163$                                                              |            |
| <b>Fit 2</b>             |                        |              |            |                                                                          |            |
| 5                        | Fe-O/N                 | 2.053        | 0.014      | 12.4                                                                     | 1.2        |
| 1                        | Fe-O/N                 | 2.470        | 0.043      | 9.9                                                                      | 6.8        |
| 1                        | Fe-Fe                  | 3.048        | 0.012      | 2.5                                                                      | 0.9        |
| $\Delta E_0 = + 1.75$ eV |                        |              |            | $F = 0.184$                                                              |            |

**Fig. S9.** Comparison of PFY  $\text{MMOH}^{\text{red}}$  with phase-shift recorection.

FT-EXAFS comparisons of HERFD- $\text{MMOH}^{\text{red}}$  with the previously published PFY- $\text{MMOH}^{\text{red}}$  from Shu, et al, subtracting the reported  $0.35 \text{ \AA}$  phase-shift (top panel), with a subtraction of  $0.50 \text{ \AA}$  phase-shift.

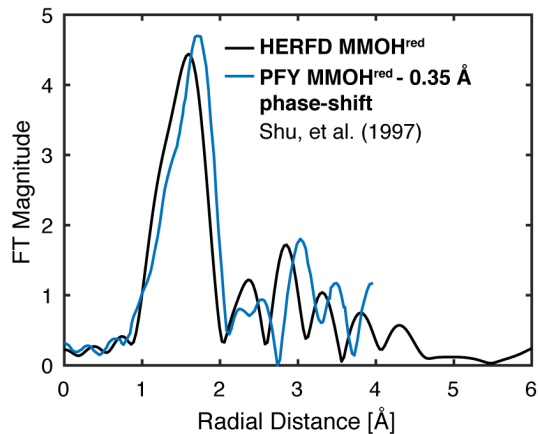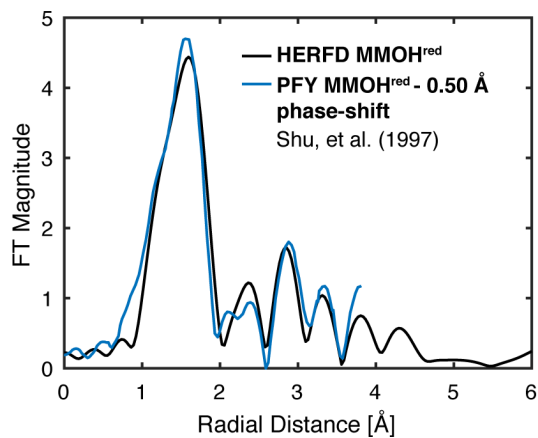

**Fig. S10.** Additional HERFD-EXAFS fits of MMOH<sup>red</sup>

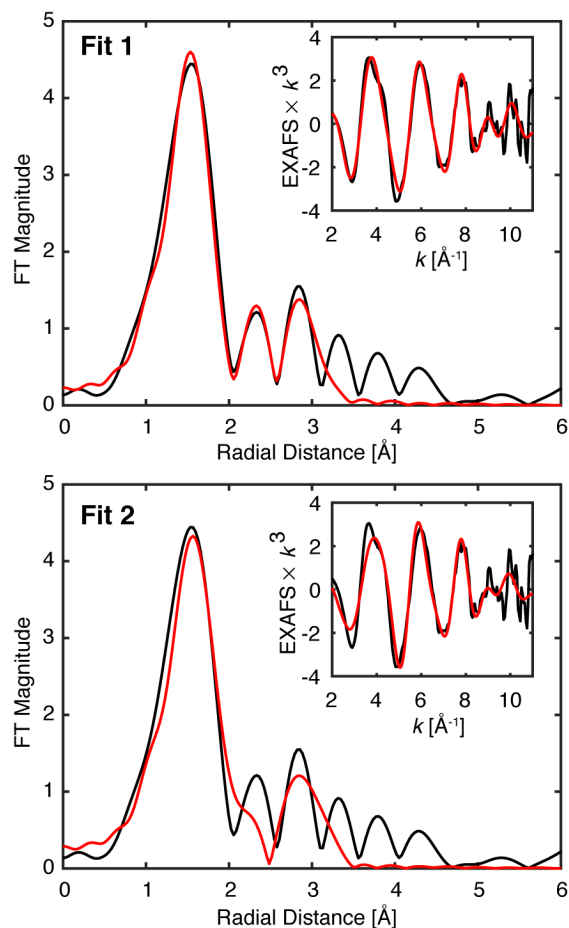

**Table S3.** HERFD-EXAFS Fit Parameters of MMOH<sup>red</sup> for Fig. S10

| <b>Fit 1</b>             |                        |              |            |                                                                          |            |
|--------------------------|------------------------|--------------|------------|--------------------------------------------------------------------------|------------|
| <b>N</b>                 | <b>Scattering Path</b> | <b>R (Å)</b> | <b>+/-</b> | <b><math>\sigma^2</math> (<math>\times 10^{-3}</math> Å<sup>2</sup>)</b> | <b>+/-</b> |
| 4                        | Fe-O/N                 | 2.044        | 0.015      | 10.3                                                                     | 1.1        |
| 1                        | Fe-O/N                 | 2.538        | 0.022      | 2.6                                                                      | 2.6        |
| 1                        | Fe-Fe                  | 3.270        | 0.026      | 8.4                                                                      | 2.5        |
| 3                        | Fe-C                   | 2.989        | 0.051      | 20.0                                                                     | 8.0        |
| $\Delta E_0 = -6.63$ eV  |                        |              |            | $F = 0.489$                                                              |            |
| <b>Fit 2</b>             |                        |              |            |                                                                          |            |
| 4                        | Fe-O/N                 | 2.062        | 0.026      | 10.3                                                                     | 1.5        |
| 1                        | Fe-O/N                 | 2.542        | 0.035      | 3.7                                                                      | 4.2        |
| 1                        | Fe-Fe                  | 3.306        | 0.041      | 9.2                                                                      | 4.1        |
| $\Delta E_0 = -4.001$ eV |                        |              |            | $F = 0.683$                                                              |            |

**Table S4.** HERFD-EXAFS Fit Parameters of MMOH-RFQ (Attempts to fit short diiron distance  $\sim 2.8 \text{ \AA}$ ).

| <b>Fit A</b>                                   |                        |              |            |                                                             |            |
|------------------------------------------------|------------------------|--------------|------------|-------------------------------------------------------------|------------|
| <b>MMOH-RFQ HERFD – 1</b>                      |                        |              |            |                                                             |            |
| <b>N</b>                                       | <b>Scattering Path</b> | <b>R (Å)</b> | <b>+/-</b> | <b><math>\sigma^2 (\times 10^{-3} \text{ \AA}^2)</math></b> | <b>+/-</b> |
| 5                                              | Fe-O/N                 | 2.053        | 0.016      | 13.7                                                        | 1.2        |
| 1                                              | Fe-O/N                 | 1.780        | 0.020      | 7.5                                                         | 2.4        |
| 0.5                                            | Fe-Fe                  | 2.668        | 0.040      | 14.6                                                        | 5.4        |
| 0.5                                            | Fe-Fe                  | 3.385        | 0.020      | 3.0                                                         | 2.1        |
| $\Delta E_0 = -2.002 \text{ eV}$               |                        |              |            | $F = 0.41487$                                               |            |
| <b>MMOH-RFQ HERFD – 2</b>                      |                        |              |            |                                                             |            |
| 5                                              | Fe-O/N                 | 2.035        | 0.015      | 12.0                                                        | 1.0        |
| 1                                              | Fe-O/N                 | 1.759        | 0.018      | 7.14                                                        | 2.4        |
| 0.5                                            | Fe-Fe                  | 2.649        | 0.051      | 16.7                                                        | 7.2        |
| 0.5                                            | Fe-Fe                  | 3.337        | 0.016      | 1.34                                                        | 1.5        |
| $\Delta E_0 = -4.186 \text{ eV}$               |                        |              |            | $F = 0.28673$                                               |            |
| <b>Best Fit (as shown in Fig. 10, Table 3)</b> |                        |              |            |                                                             |            |
| <b>MMOH-RFQ HERFD – 1</b>                      |                        |              |            |                                                             |            |
| <b>N</b>                                       | <b>Scattering Path</b> | <b>R (Å)</b> | <b>+/-</b> | <b><math>\sigma^2 (\times 10^{-3} \text{ \AA}^2)</math></b> | <b>+/-</b> |
| 1                                              | Fe-O                   | 1.781        | 0.018      | 8.3                                                         | 2.3        |
| 5                                              | Fe-O/N                 | 2.057        | 0.014      | 13.8                                                        | 1.0        |
| 0.3                                            | Fe-Fe                  | 3.067        | 0.025      | 1.9                                                         | 2.4        |
| 0.7                                            | Fe-Fe                  | 3.343        | 0.030      | 8.0                                                         | 4.2        |
| $\Delta E_0 = -1.454 \text{ eV}$               |                        |              |            | $F = 0.35461$                                               |            |
| <b>MMOH-RFQ HERFD – 2</b>                      |                        |              |            |                                                             |            |
| 1                                              | Fe-O                   | 1.758        | 0.011      | 7.6                                                         | 1.5        |
| 5                                              | Fe-O/N                 | 2.035        | 0.009      | 12.1                                                        | 0.6        |
| 0.3                                            | Fe-Fe                  | 3.053        | 0.019      | 1.2                                                         | 1.8        |
| 0.7                                            | Fe-Fe                  | 3.303        | 0.015      | 3.7                                                         | 1.6        |
| $\Delta E_0 = -4.060 \text{ eV}$               |                        |              |            | $F = 0.20059$                                               |            |

**Fig. S11.** HERFD-EXAFS fits of MMOH-RFQ – 1 and 2, as Detailed in Table S4.

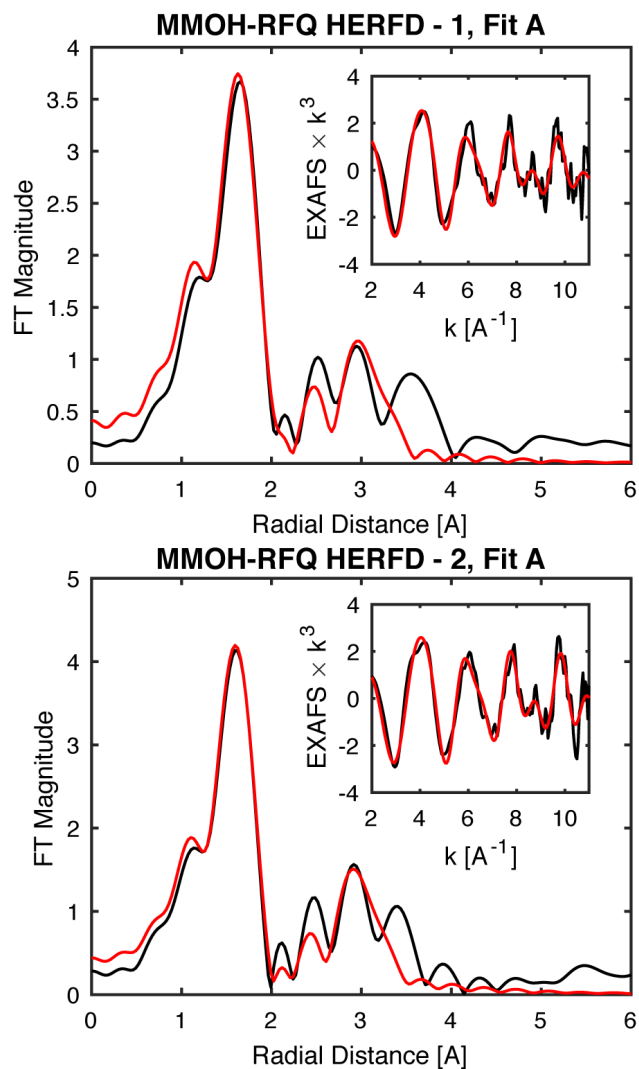



1. Castillo, R. G.; Banerjee, R.; Allpress, C. J.; Rohde, G. T.; Bill, E.; Que, L.; Lipscomb, J. D.; DeBeer, S., High-energy-resolution fluorescence-detected x-ray absorption of the Q intermediate of soluble methane monooxygenase. *J. Am. Chem. Soc.* **2017**, *139* (49), 18024-18033.
2. Ravel, B.; Newville, M., ATHENA, ARTEMIS, HEPHAESTUS: data analysis for X-ray absorption spectroscopy using IFEFFIT. *J. of Synchrotron Rad.* **2005**, *12* (4), 537-541.
3. Zabinsky, S. I.; Rehr, J. J.; Ankudinov, A.; Albers, R. C.; Eller, M. J., Multiple-scattering calculations of X-ray-absorption spectra. *Phys. Rev. B: Condens. Matter Mater. Phys.* **1995**, *52* (4), 2995-3009.
4. Whittington, D. A.; Lippard, S. J., Crystal structures of the soluble methane monooxygenase hydroxylase from *Methylococcus capsulatus* (Bath) demonstrating geometrical variability at the dinuclear iron active site. *J. Am. Chem. Soc.* **2001**, *123* (5), 827-838.
5. The PyMOL Molecular Graphics System, Version 1.8. **2015**.
